# Supplementary material for: Fluorometric detection of EGFR exon 19 deletion mutation in lung cancer cells using graphene oxide
Source: Royal Society of Chemistry journal article supplement (doi:10.1039/c8an00098k), 2018-01-01
Supplement: c8an00098k1.pdf [file c8an00098k1.pdf]

**Electronic Supplementary Information for Analyst**

**Fluorometric detection of EGFR exon 19 deletion mutation in  
lung cancer cells using graphene oxide**

***Dong-Min Kim,<sup>a</sup> Dong Ho Kim,<sup>b</sup> Woong Jeong,<sup>c</sup> Kye Young Lee,<sup>d</sup> and Dong-Eun Kim<sup>\*a</sup>***

*<sup>a</sup> Department of Bioscience and Biotechnology, Konkuk University, Gwangjin-gu, Seoul 05029, Republic of Korea*

*<sup>b</sup> Department of Pediatrics, Korea Cancer Center Hospital, Nowon-gu, Seoul 01812, Republic of Korea*

*<sup>c</sup> Department of Emergency Medicine, Kyung Hee University Hospital, Kangdong-gu, Seoul 05278, Republic of Korea*

*<sup>d</sup> Department of Internal Medicine, Konkuk University Medical Center, Gwangjin-gu, Seoul 05029, Republic of Korea*

*\*Corresponding Author*

## **Supplementary experimental methods**

### **1. Preparation of complementary DNA and PCR amplification**

Total cellular RNA was extracted from PC9 cells using TRIzol<sup>®</sup> solution (Invitrogen, Carlsbad, CA, USA) according to the manufacturer's instructions and dissolved in a final volume of 30  $\mu$ L. A total of 1  $\mu$ g RNA was used for reverse transcription with a PrimerScript 1<sup>st</sup> strand cDNA Synthesis Kit (Takara Bio, Inc., Shiga, Japan). Next, 2  $\mu$ L of complementary DNA (cDNA) was subjected to PCR with FAM-labeled EGFR exon 19 deletion DNA probe under the above-mentioned conditions except that reverse primer 4 was used rather than reverse primer 3 (Experimental).

### **2. Optimization of graphene oxide and Mg<sup>2+</sup> concentration**

To establish the conditions with the highest difference in fluorescence between EGFR exon 19 wild-type and mutant type, the amount of GO and Mg<sup>2+</sup>, which is related to the affinity for DNA binding to GO,<sup>1</sup> were optimized. A 5- $\mu$ L aliquot of PCR product was incubated with various GO concentrations (0, 3, 5, 7, 10, 15, 20, 25  $\mu$ g mL<sup>-1</sup>) and the fluorescence intensity ratio (F/F<sub>0</sub>) was measured as described above; F and F<sub>0</sub> represent the fluorescence intensity of the FAM-labeled probe derived from the PCR products amplified with PC9 gDNA (EGFR exon 19 deletion) and A549 gDNA (EGFR wild-type), respectively. To determine proper Mg<sup>2+</sup> concentration, different concentrations of MgCl<sub>2</sub> (0, 0.1, 1, 3, 6, 10 mM) were incubated with 20  $\mu$ g mL<sup>-1</sup> of GO and the fluorescence intensity ratio (F/F<sub>0</sub>) was measured in a 96-well micro plate.

## Supplementary data (tables and figures)

**Table S1.** Oligonucleotide sequences (5' to 3').

| Name                            | Sequence* (5' → 3')                                                                                       | Size (nts) |
|---------------------------------|-----------------------------------------------------------------------------------------------------------|------------|
| Forward primer 1                | GATCAAAGTGCTGGGCTCCGGTG                                                                                   | 23         |
| Forward primer 2 for plasma     | CTCTGGATCCCAGAAGGTGAGAAAGTT                                                                               | 27         |
| Reverse primer 3                | AGAAAAGGTGGGCCTGAGGTTTCAGA                                                                                | 25         |
| Exon19 deletion probe           | <b>FAM</b> -CCCGTCGCTATCAAGACATCTCCGAAAGCCAACAAGG<br>AAATCCTCGATGTGAGTTTCTGCTTTGCTGTGTGGGGTCCAT- <b>P</b> | 80         |
| Taqman probe                    | <b>FAM</b> -CCCGTCGCTATCAAGACATCTCCGAAAGCC- <b>TAMRA</b>                                                  | 30         |
| Reverse primer 4 for cDNA       | CTGCGTGATGAGCTGCACGGT                                                                                     | 21         |
| Reverse primer 5 for sequencing | CTGGGTAGATGCCAGTAATTGCCTG                                                                                 | 25         |

\*FAM, 6-fluorescein amidite modification; TAMRA, 5-Carboxy-tetramethylrhodamine modification; P, phosphorylation; nts, nucleotides.

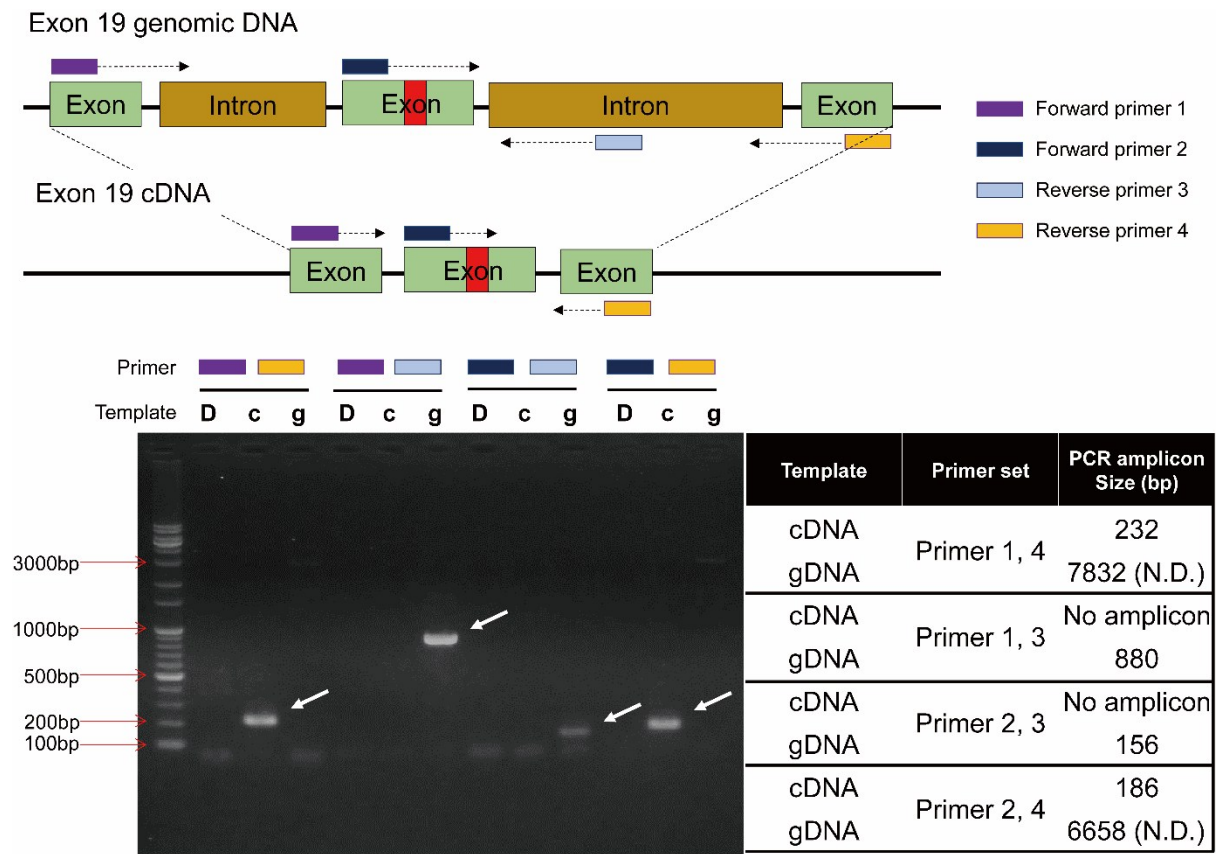

**Fig. S1.** Agarose gel electrophoresis analysis of PCR products amplified (indicated with arrows) with different templates and primers. PCR products of big size (longer than 1,000 bp) was not detected (denoted as N.D.), because template with big span was not amplified due to a short extension time (30 s) during PCR. Abbreviations: D, Distilled water; c, complementary DNA (cDNA); g, genomic DNA (gDNA).

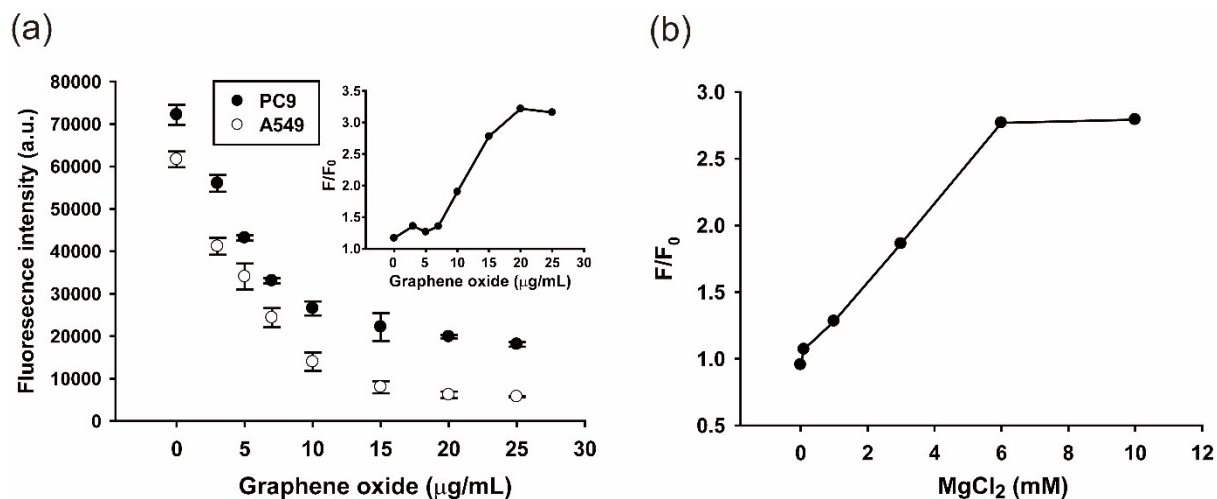

**Fig. S2.** Optimization of GO and  $\text{Mg}^{2+}$  concentration for GO-based fluorometric assay. (a) The fluorescence intensity ratio ( $F/F_0$ ) change, which was derived from fluorescence intensity ratio between PC9 (mutant gene,  $F$ ) and A549 (wild-type gene,  $F_0$ ), with the amount of GO. The maximal fluorescence intensity ratio was observed with 20  $\mu\text{g mL}^{-1}$  of GO. *Inset:* Fluorescence intensity ratio ( $F/F_0$ ) with different concentrations of GO. (b) Optimization of  $\text{Mg}^{2+}$  concentration. The highest fluorescence intensity ratio ( $F/F_0$ ) was obtained in  $\text{MgCl}_2$  over 6 mM.

**Table S2.** Comparison of experimental detection limit and selectivity between GO-based PCR and published methods for detecting EGFR exon 19 deletion mutation.

| Method              | Labeling <sup>a</sup> | Detection limit <sup>b</sup> | Selectivity <sup>c</sup> | Reference  |
|---------------------|-----------------------|------------------------------|--------------------------|------------|
| GO-based PCR        | 1                     | 49 pg                        | 0.1 %                    | This study |
| qPCR                | 2                     | 10 ng uL <sup>-1</sup>       | 5 ~ 10 %                 | 2          |
| Cast PCR            | 2                     | -                            | 0.1 %                    | 3          |
| PNA clamping PCR    | 1                     | 8.6 ng uL <sup>-1</sup>      | -                        | 4          |
| Scorpion ARMS       | 2                     | 2.3 ng uL <sup>-1</sup>      | 1 %                      | 5          |
| Droplet digital PCR | 2                     | -                            | 0.04 %                   | 6          |
| NGS                 | 4                     | -                            | ~ 1 %                    | 7          |

<sup>a</sup> Labels such as fluorophore or quencher required for assay

<sup>b</sup> The lowest quantity of a mutant gene required to distinguish the sample from the blank.

<sup>c</sup> Minimum percentage of mutant gene in an excess wild-type gene required for reliable mutation detection.

Abbreviation: qPCR, quantitative PCR; cast PCR, Competitive allele-specific Taqman PCR; PNA, peptide nucleic acid; scorpion SARMS, scorpion amplified refractory mutation system; NGS, next-generation sequencing

## References

1. M. Wu, R. Kempaiah, P. J. J. Huang, V. Maheshwari and J. W. Liu, *Langmuir*, 2011, **27**, 2731-2738.
2. K. Endo, A. Konishi, H. Sasaki, M. Takada, H. Tanaka, M. Okumura, M. Kawahara, H. Sugiura, Y. Kuwabara, I. Fukai, A. Matsumura, M. Yano, Y. Kobayashi, K. Mizuno, H. Haneda, E. Suzuki, K. Iuchi and Y. Fujii, *Lung Cancer-J lslc*, 2005, **50**, 375-384.
3. C. Roma, C. Esposito, A. M. Rachiglio, R. Pasquale, A. Iannaccone, N. Chicchinelli, R. Franco, R. Mancini, S. Pisconti, A. De Luca, G. Botti, A. Morabito and N. Normanno, *Biomed Res Int*, 2013, **2013**, 485087
4. H. R. Kim, S. Y. Lee, D. S. Hyun, M. K. Lee, H. K. Lee, C. M. Choi, S. H. Yang, Y. C. Kim, Y. C. Lee, S. Y. Kim, S. H. Jang, J. C. Lee and K. Y. Lee, *J Exp Clin Canc Res*, 2013, **32**, 50.
5. H. L. Duan, J. L. Lu, T. Lu, J. Gao, J. Zhang, Y. Xu, M. Z. Wang, H. W. Wu, Z. Y. Liang and T. H. Liu, *Int J Clin Exp Patho*, 2015, **8**, 13136-13145.
6. G. S. Zhu, X. Ye, Z. W. Dong, Y. C. Lu, Y. Sun, Y. Liu, R. McCormack, Y. Gu and X. Q. Liu, *J Mol Diagn*, 2015, **17**, 265-272.
7. D. de Biase, M. Visani, U. Malapelle, F. Simonato, V. Cesari, C. Bellevicine, A. Pession, G. Troncone, A. Fassina and G. Tallini, *Plos One*, 2013, **8**, e83607.
